# Supplementary material
Source: PubMed Central journal article supplement (PMC3308733)
Supplement: supp_M111.311605_jbc.M111.311605-1.pdf [file supp_M111.311605_jbc.M111.311605-1.pdf]

**Table S1. Primer sequences used for qRT-PCR.**

|               |                                                   |
|---------------|---------------------------------------------------|
| <i>ACTB</i>   | CACCATTGGCAATGAGCGGTTC<br>AGGTCTTTGCGGATGTCCACGT  |
| <i>LCOR</i>   | AAGTCCATGTGCTGGCAGCACT<br>ATCACCCTCCGAAGTCCGTCT   |
| <i>KLF6</i>   | CGGCTGCAGGAAAGTTTACA<br>AAAAACACCTGTACAGTGGGAGC   |
| <i>CTBP1</i>  | AGATGCCCATCCTGAAGGACGT<br>GAGGGCTTTGAACTTCTCCAGG  |
| <i>CDKN1A</i> | AGGTGGACCTGGAGACTCTCAG<br>TCCTCTTGAGAAGATCAGCCG   |
| <i>CDH1</i>   | GCCTCCTGAAAAGAGAGTGGAAG<br>TGGCAGTGTCTCTCCAAATCCG |
| <i>ATF3</i>   | CGCTGGAATCAGTCACTGTCAG<br>CTTGTTTCGGCACTTTGCAGCTG |
| <i>PLAU</i>   | GGCTTAACTCCAACACGCAAGG<br>CCTCCTTGGAACGGATCTTCAG  |
| <i>MMP9</i>   | GCCACTACTGTGCCTTTGAGTC<br>CCCTCAGAGAATCGCCAGTACT  |
| <i>TFPI2</i>  | TACTGGCTGTGGAGGGAATGAC<br>CGGATTCTACTGGCAAAGCGAAG |

Fig.S1

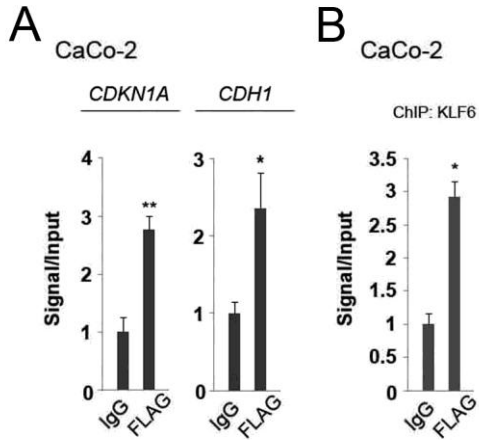

**FIGURE S1.** Analysis of FLAG-LCoR binding to the *CDKN1A* and *CDH1* promoters by ChIP assay. A. ChIP assays were performed with anti-FLAG (F1804) antibody following transfection with FLAG-LCoR in CaCo-2 cells. qPCR was performed with specific primers for the *CDKN1A* or *CDH1* promoters. B. Results of re-ChIP assays are shown, in which a first round of ChIP for KLF6 (SC-7158) followed by a second round of immunoprecipitation for FLAG (F1804) were performed in CaCo-2 cells, followed by qPCR with specific primers for the *CDKN1A* promoter.

Fig.S2

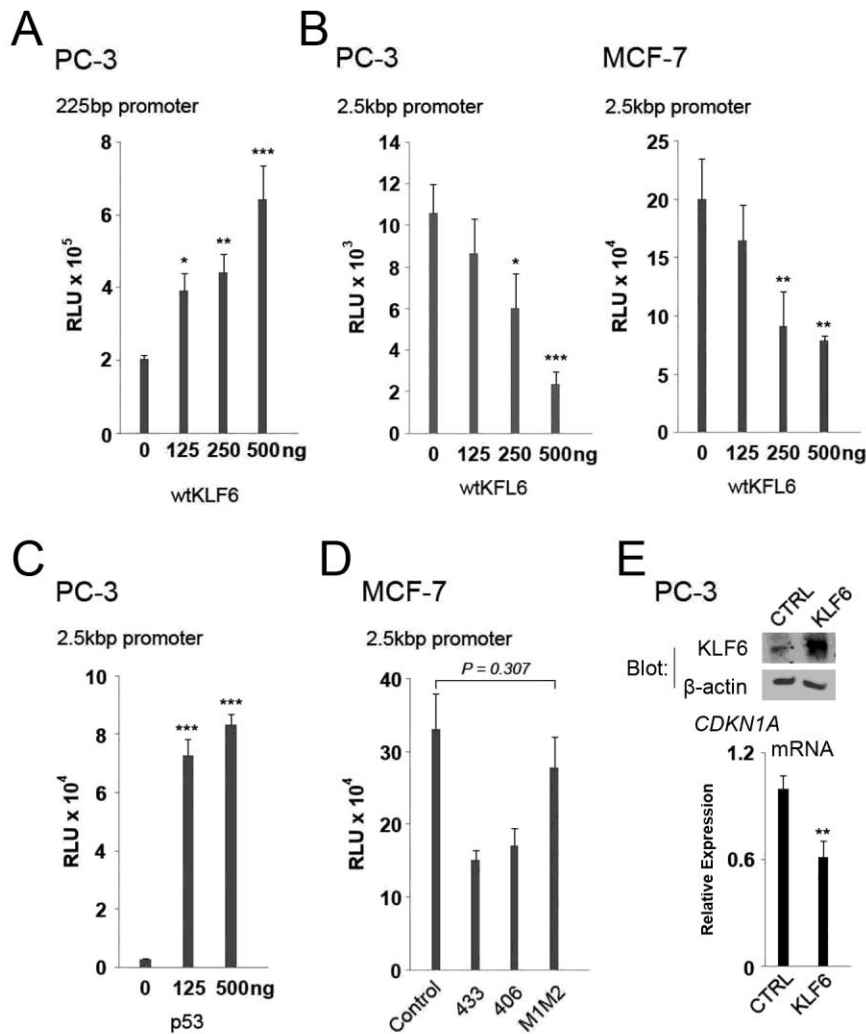

**FIGURE S2.** KLF6 and LCoR regulation of the expression of reporter gene driven by the *CDKN1A* promoter. A. Luciferase reporter gene assays with a short fragment (225bp) of the *CDKN1A* promoter were performed in PC-3 cells with wild type KLF6 (wtKLF6). B. Luciferase reporter gene assays with a long fragment (2.5kbp) of the *CDKN1A* promoter were performed in PC-3 (Left) and MCF-7 cells (Right) with wtKLF6. C. A control luciferase reporter gene assay with the long fragment (2.5kbp) of the *CDKN1A* promoter was performed with wild type p53 in PC-3 cells. D. A luciferase reporter gene assay with the long fragment of the *CDKN1A* promoter was performed with 500ng of the different LCoR variants in MCF-7 cells. One way ANOVAs were performed followed by the Tukey test for multiple comparisons to establish statistical significance on all assays. E. Inset: Western Blot with anti-KLF6 antibody (SC-7158) of transfected PC-3 cells with control or KLF6 expression vectors. RT-qPCR with *CDKN1A* primers of PC-3 extracts following transfection with a control or KLF6 expression vector.

Fig.S3

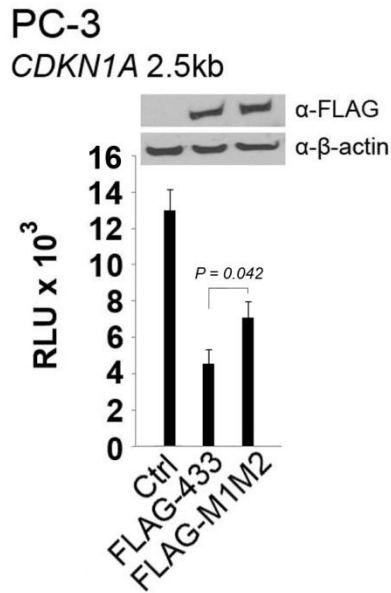

**FIGURE S3.** Wild type and mutant LCoR regulate expression of a reporter gene construct driven by the *CDKN1A* promoter. Inset: A western blot for α-FLAG or α-β-actin was carried out in PC-3 cells transfected with FLAG-LCoR-433 (wild type) or FLAG-LCoR-M1M2 (mutant). A luciferase assay was performed with the *CDKN1A* promoter in PC-3 cells with the indicated FLAG-tagged vectors. One way ANOVA was performed followed by the Tukey test for multiple comparisons to establish statistical significance.

# Fig.S4

PC-3  
*CDH1*

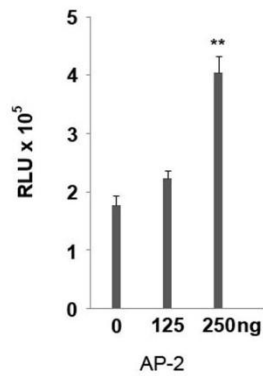

**FIGURE S4.** The transcription factor AP-2 transactivates the *CDH1* promoter. A control luciferase reporter gene assay was performed in PC-3 with the *CDH1* promoter and an expression vector for AP-2. One way ANOVA was performed followed by the Tukey test for multiple comparisons to establish statistical significance.

Fig.S5

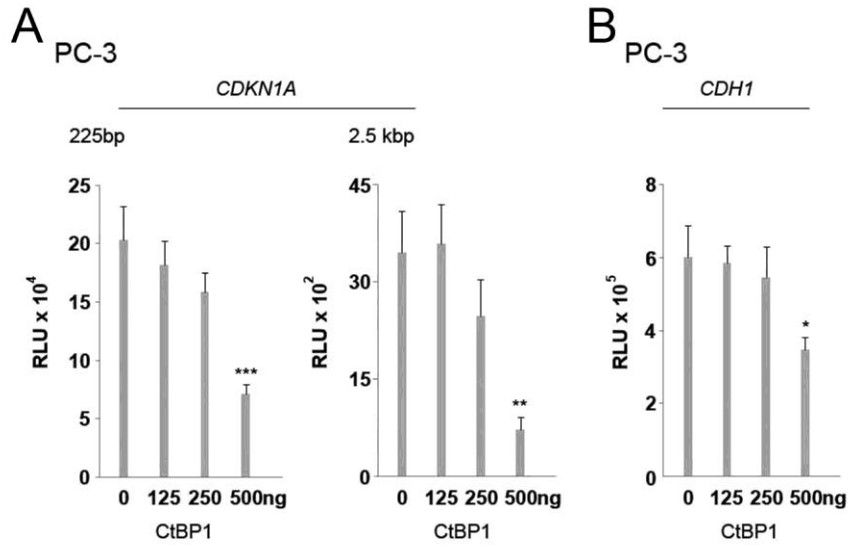

**FIGURE S5.** CtBP1 acts as a repressor of a reporter gene driven by the *CDKN1A* or *CDH1* promoter. A, Luciferase reporter gene assays with the short (225bp) and the long (2.5kbp) fragment of the *CDKN1A* promoter were performed in PC-3 cells with an expression vector for CtBP1. One way ANOVAs were performed followed by the Tukey test for multiple comparisons to establish statistical significance in all assays. B, A luciferase reporter gene assay with a fragment of the *CDH1* promoter was performed in PC-3 cells with an expression vector for CtBP1.

Fig.S6

A

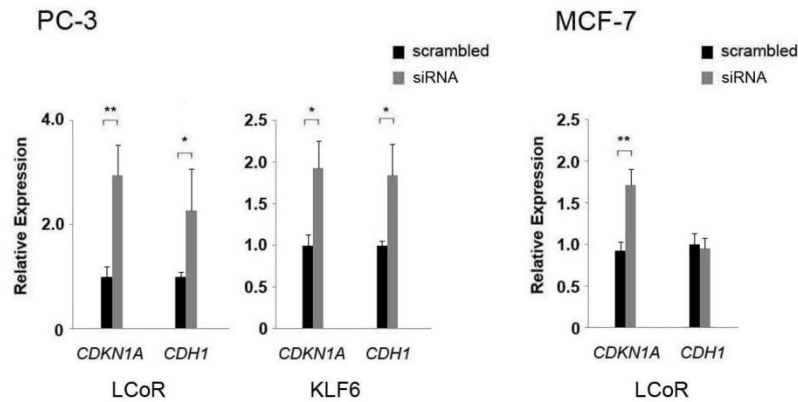

B

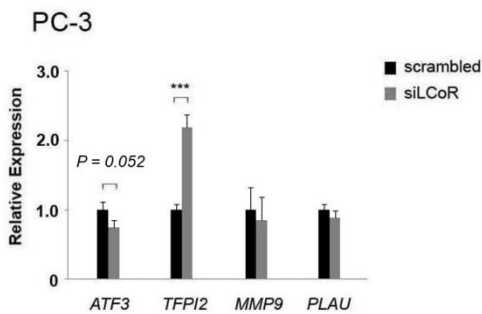

C

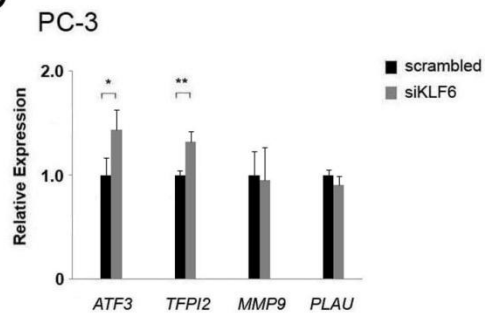

D

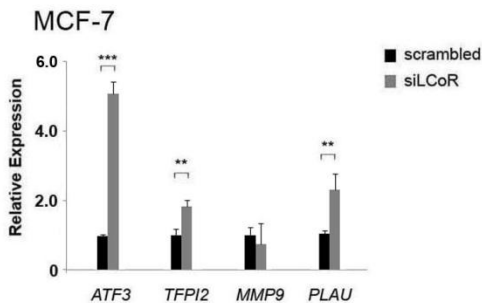

**FIGURE S6.** Additional Gene knockdowns confirm regulation of *CDKN1A* and *CDH1* and additional target genes by KLF6 and LCoR. A. mRNA levels of the *CDKN1A* or *CDH1* genes were measured by RT-qPCR after siRNA-mediated knockdown of LCoR, and KLF6 in PC-3 cells and LCoR in MCF-7 cells. B and D. mRNA levels of the indicated KLF6 target genes were measured by RT-qPCR after siRNA-mediated LCoR knockdown in PC-3 (B) and MCF-7 (D) cells. C. mRNA levels of the indicated KLF6 target genes were measured by RT-qPCR after siRNA-mediated KLF6 knockdown in PC-3 cells. Two-sample t-tests were performed to determine statistical significance in all cases.

Fig.S7

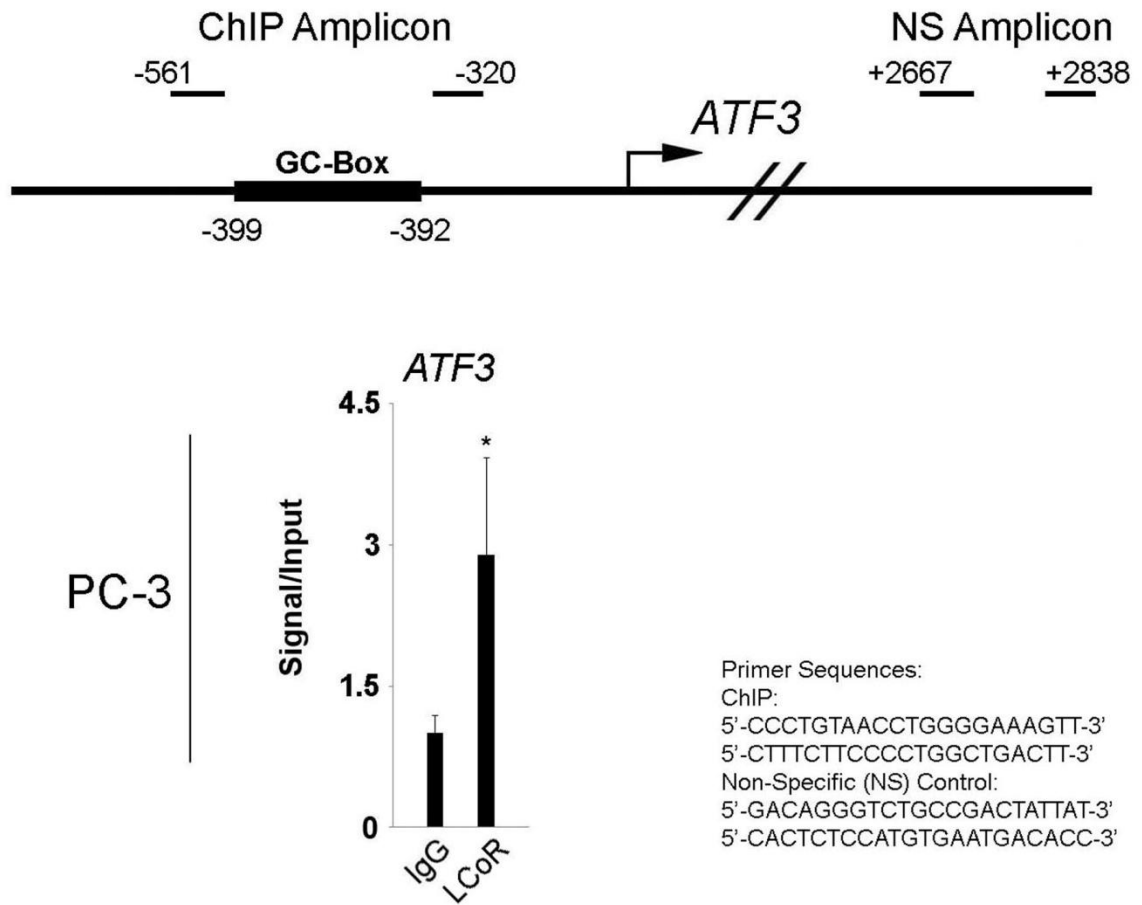

**FIGURE S7.** LCoR binds the same region on the *ATF3* promoter as KLF6. A ChIP assay was performed with anti-LCoR (sc-134674) antibody in PC-3 cells followed by qPCR with the indicated ChIP primers and non-specific (NS) control primers.
